# Supplementary material for: Immature platelet fraction and bone marrow findings: diagnostic and prognostic value in hematology
Source: Research Square preprint supplement (doi:10.21203/rs.3.rs-6500237/v1), 2025-05-07
Supplement: Supplementary file 1 [file 179f4a896611a83fcd01079a.docx]

**Supplementary Table 1 Etiological profile of primary hematologic disorders**

| Primary hematologic disorders† | n=1552,  n (%) | IPF%,  median (range) | Meg# cells/mm3, median (range) |
| --- | --- | --- | --- |
| Myeloid neoplasms  APL  AML  CML  ET  MDS  MPN  MF  Lymphoid neoplasms  ALL  CLL  Lymphomas  HL  Non-Hodgkin lymphomas  AITL  ATLL  DLBC  FL  Maltoma  MCL  MZL  Plasma cell neoplasms  MGUS  MM  LPL  Benign hematologic disorders  AA  AIHA  Castleman disease  ITP | 20 (1.2)  110 (7.0)  40 (2.5)  80 (5.1)  364 (23.4)  10 (0.6)  10 (0.6)  30 (1.9)  10 (0.6)  20 (1.2)  10 (0.6)  50 (3.2)  300 (19.3)  80 (5.1)  40 (2.5)  20 (1.2)  20 (1.2)  70 (4.5)  160 (10.3)  20 (1.2)  48 (3.0)  20 (1.2)  10 (0.6)  20 (1.2) | 6.50 (5.10–9.40)  3.40 (1.00–9.60)  7.85 (3.00–31.00)  3.50 (2.40–5.00)  6.80 (0.40–43.50)  4.50 (3.00–5.00)  6.00 (3.10–7.65)  2.80 (0.66–4.60)  3.40 (2.21–3.55)  2.10 (1.20–3.00)  2.00 (1.11–2.56)  5.40 (0.90–9.10)  2.25 (0.80–21.80)  2.00 (0.90–3.40)  2.25 (1.50–3.00)  2.65 (2.20–3.10)  2.25 (1.50–3.00)  3.00 (2.00–7.25)  2.25 (0.70–8.10)  0.65 (0.30–1.00)  2.65 (0.40–7.70)  2.15 (1.30–3.00)  0.90 (0.40–1.21)  14.80 (9.30–20.30) | 10 (0-15)  15 (0-15)  75 (15-105)  23 (15-90)  15 (0-105)  15 (0-15)  15 (0-15)  7 (0-15)  10 (0-15)  60 (15-105)  15 (0-15)  15 (0-30)  15 (0-105)  30 (10-75)  15 (0-15)  7 (0-15)  15 (0-15)  15 (15-60)  15 (15-90)  7 (0-15)  0 (0-15)  22 (15-30)  20 (15-45)  26 (15-30) |

IPF, immature platelet fraction; Meg#, megakaryocyte count of bone marrow; APL, acute promyelocytic leukemia; AML, acute myeloid leukemia; CML, chronic myeloid leukemia; ET, essential thrombocythemia; MDS, myelodysplastic syndromes; MPN, myeloproliferative neoplasms; MF, myelofibrosis; ALL, acute lymphoid leukemia; CLL, chronic lymphocytic leukemia; HL, Hodgkin lymphoma; AITL, angioimmunoblastic T-cell lymphoma; ATLL, adult T-cell leukemia/lymphoma; DLBCL, diffuse large B-cell lymphoma; FL, follicular lymphoma; Maltoma, mucosa-associated lymphoid tissue lymphoma; MCL, mantle cell lymphoma; MZL, marginal zone lymphomas; MGUS, monoclonal gammopathy of undetermined significance; MM, multiple myeloma; LPL, lymphoplasmacytic lymphoma; AA, aplastic anemia; AIHA, autoimmune hemolytic anemia; ITP, immune thrombolytic purpura.

†This classification reflected the current understanding of hematologic malignancies, incorporating clinical and genetic features, which noted that the world health organization (WHO) classification was periodically updated to reflect discoveries and advancements in our understanding of these diseases.
